# Supplementary material
Source: publisher figshare collection journal article supplement (https://sage.figshare.com/ndownloader/files/24456123)
Supplement: Supplementary file 1 [file 24456123]

**Supplemental Figure A3.** Three-dimensional illustration of seven clusters. Each dot represents one of the 57 organ procurement organizations. Each color denotes cluster membership. Note that Puerto Rico is not included.

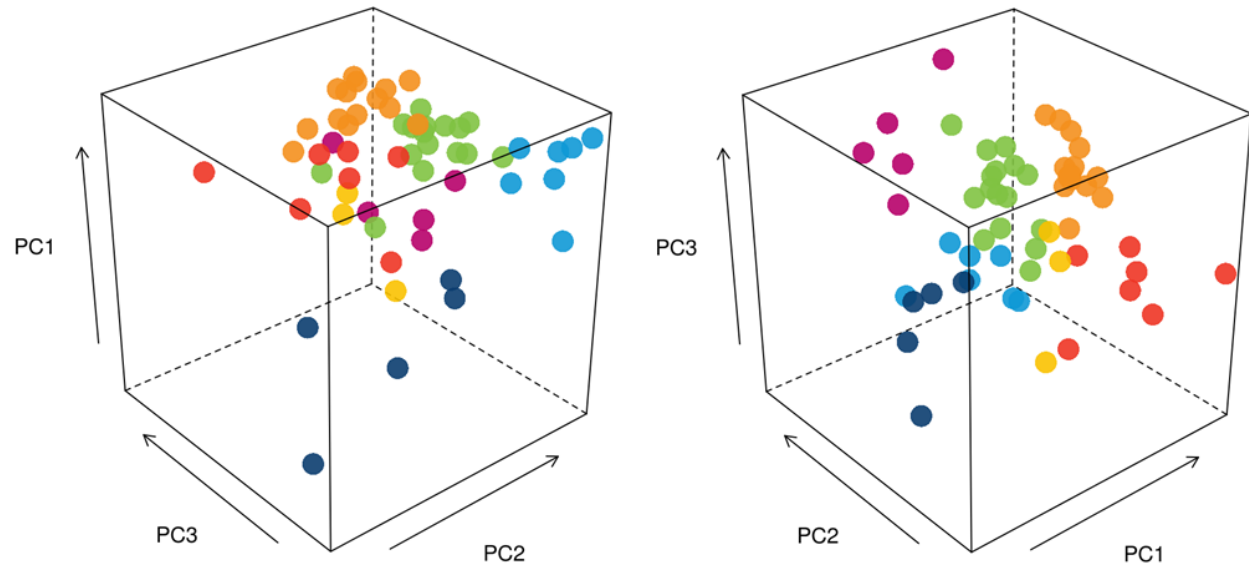

PC, principal component
